# Supplementary material for: Pirfenidone Inhibits Cell Proliferation and Collagen I Production of Primary Human Intestinal Fibroblasts
Source: PubMed Central journal article supplement (PMC7140656; doi:10.3390/cells9030775), 2020-03-22
Supplement: cells-09-00775-s001.pdf [file cells-09-00775-s001.pdf]

Supplementary tables:

**Table 1.** TaqMan primers and probes for Real-time Quantitative PCR analysis.

| Gene   | TaqMan primers and probes           |
|--------|-------------------------------------|
| 18S    | Forward: CGGCTACCACATCCAAGGA        |
|        | Reverse: CCAATTACAGGGCTCGAAA        |
|        | Probe: CGCGCAAATTACCCACTCCCGA       |
| COL1A1 | Forward: GGCCAGAAAGAACTGGTACATC     |
|        | Reverse: CCGCCATACTCGAACTGGAA       |
|        | Probes: CCCCAAGGACAAGAGGCATGTCTG    |
| ACTA2  | Forward: GGGACGACATGGAAAAGATCTG     |
|        | Reverse: CAGGGTGGGATGCTCTTCA        |
|        | Probe: CACTCTTCTACAATGAGCTTCGTGTGCC |

**Table 2.** SYBR green primer sequences used for Real-time Quantitative PCR Analysis.

| Gene          | SYBR green primers              |
|---------------|---------------------------------|
| <u>COL3A1</u> | Forward: CTGGACCCAGGGTCTTC      |
|               | Reverse: CATCTGATCCAGGGTTCCA    |
| <u>COL4A1</u> | Forward: AGGAGAGAAGGGCGCTGT     |
|               | Reverse: TCCAGGTAAGCCGTCAACA    |
| <u>COL6A1</u> | Forward: GAAGAGAAGGCCCCGTTG     |
|               | Reverse: CGGTAGCCTTATAGGTCGGATA |
| <u>FN1</u>    | Forward: CTGGCCGAAAATACATGTAAA  |
|               | Reverse: CCACAGTCGGGTCAGGAG     |
| <u>ELN</u>    | Forward: CGGGAGTAGTTGGTGTCCC    |
|               | Reverse: AGCTGCTTCTGGTGACACAA   |

**Table 3.** Antibodies catalog numbers and dilutions.

| Antibody                                     | Cat no. (dilution)   | Company               |
|----------------------------------------------|----------------------|-----------------------|
| GAPDH                                        | CB1001 (1:1000)      | Calbiochem            |
| Phospho-mTOR                                 | 2971 (1:1000)        | Cell Signaling        |
| mTOR                                         | 2983T (1:1000)       | Cell Signaling        |
| Phospho-p70S6K Thr389                        | 9205 (1:1000)        | Cell Signaling        |
| p70S6K                                       | 9202S (1:1000)       | Cell Signaling        |
| Phospho-4E-BP1 Ser65                         | 9451 (1:1000)        | Cell Signaling        |
| 4E-BP1                                       | 9644T (1:1000)       | Cell Signaling        |
| <u>Phospho-Smad2 (S465/467)/3 (S423/425)</u> | <u>8828 (1:1000)</u> | <u>Cell Signaling</u> |
| <u>Smad2/3</u>                               | <u>3120 (1:1000)</u> | <u>Cell Signaling</u> |
| <u>Phospho-p38 MAPK</u>                      | <u>9211 (1:1000)</u> | <u>Cell Signaling</u> |
| <u>p38 MAPK</u>                              | <u>9212 (1:1000)</u> | <u>Cell Signaling</u> |
| Polyclonal Rabbit Anti-Mouse Immunoglobulins | P0260 (1:2000)       | DAKO                  |
| Polyclonal Rabbit Anti-Goat Immunoglobulins  | P0160 (1:2000)       | DAKO                  |
| Polyclonal Goat Anti-Rabbit Immunoglobulins  | P0448 (1:2000)       | DAKO                  |

**Supplementary Figure:**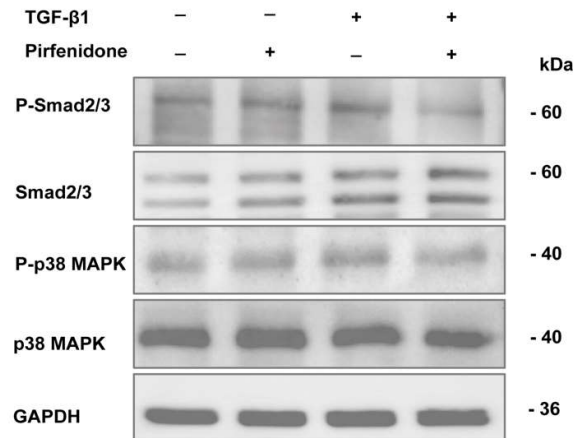

**Figure 1.** Pirfenidone does not suppress Smad2/3 and p38 MAPK phosphorylation in p-hIFs. (A) p-hIFs were exposed to pirfenidone (1 mg/ml) and/or, TGF- $\beta$ 1 (2.5 ng/ml) for 6 h. Total and phosphorylated Smad2/3 and p38 MAPK were assessed by Western blot analysis. Compared with the control group, TGF- $\beta$ 1 or pirfenidone did not pronouncedly change levels of phosphorylated Smad2/3 or p38 MAPK in p-hIFs. GAPDH is included as protein loading control.

**Supplementary References for Figure 6:**

1. Kurahara L.H.; Hiraishi K.; Hu Y.; et al. Activation of Myofibroblast TRPA1 by Steroids and Pirfenidone Ameliorates Fibrosis in Experimental Crohn's Disease. *Cell. Mol. Gastroenterol. Hepatol.* **2018**, *5*, 299–318.
2. Sun Y.; Zhang Y.; Chi P. Pirfenidone suppresses TGFbeta1induced human intestinal fibroblasts activities by regulating proliferation and apoptosis via the inhibition of the Smad and PI3K/AKT signaling pathway. *Mol. Med. Rep.* **2018**;18, 3907–3913.
3. Li G.; Ren J.; Hu Q.; et al. Oral pirfenidone protects against fibrosis by inhibiting fibroblast proliferation and TGF-beta signaling in a murine colitis model. *Biochem. Pharmacol.* **2016**;117, 57–67.
4. Sun Y.W.; Zhang Y.Y.; Ke X.J.; Wu X.J.; Chen Z.F.; Chi P. Pirfenidone prevents radiation-induced intestinal fibrosis in rats by inhibiting fibroblast proliferation and differentiation and suppressing the TGF-beta1/Smad/CTGF signaling pathway. *Eur. J. Pharmacol.* **2018**, *822*, 199–206.
5. Li Z.; Liu X.; Wang B.; et al. Pirfenidone suppresses MAPK signalling pathway to reverse epithelial-mesenchymal transition and renal fibrosis. *Nephrology* **2017**;22, 589–597.
6. Ji X.; Naito Y.; Weng H.; et al. Renoprotective mechanisms of pirfenidone in hypertension-induced renal injury: Through anti-fibrotic and anti-oxidative stress pathways. *Biomed. Res.* **2013**, *34*, 309–319.
7. Conte E.; Gili E.; Fagone E.; Fruciano M.; Iemmolo M.; Vancheri C. Effect of pirfenidone on proliferation, TGF-beta-induced myofibroblast differentiation and fibrogenic activity of primary human lung fibroblasts. *Eur. J. Pharm. Sci.* **2014**, *58*, 13–19.
8. Boehme S.A.; Franz-Bacon K.; DiTirro D.N.; Ly T.W.; Bacon K.B. MAP3K19 Is a Novel Regulator of TGF-beta Signaling That Impacts Bleomycin-Induced Lung Injury and Pulmonary Fibrosis. *PLoS One* **2016**, *11*, doi:10.1371/journal.pone.0154874
9. Kurita Y.; Araya J.; Minagawa S.; et al. Pirfenidone inhibits myofibroblast differentiation and lung fibrosis development during insufficient mitophagy. *Respir. Res.* **2017**, *18*, 114.
10. Molina-Molina M.; Machahua-Huamani C.; Vicens-Zygmunt V.; et al. Anti-fibrotic effects of pirfenidone and rapamycin in primary IPF fibroblasts and human alveolar epithelial cells. *BMC Pulm. Med.* **2018**, *18*, 63.
